# Supplementary material for: The value of lncRNA FENDRR and FOXF1 as a prognostic factor for survival of lung adenocarcinoma
Source: PubMed Central journal article supplement (PMC7138163), 2017-10-27
Supplement: oncotarget-11-1172-s001.pdf [file oncotarget-11-1172-s001.pdf]

## The value of lncRNA *FENDRR* and *FOXF1* as a prognostic factor for survival of lung adenocarcinoma

### SUPPLEMENTARY MATERIALS

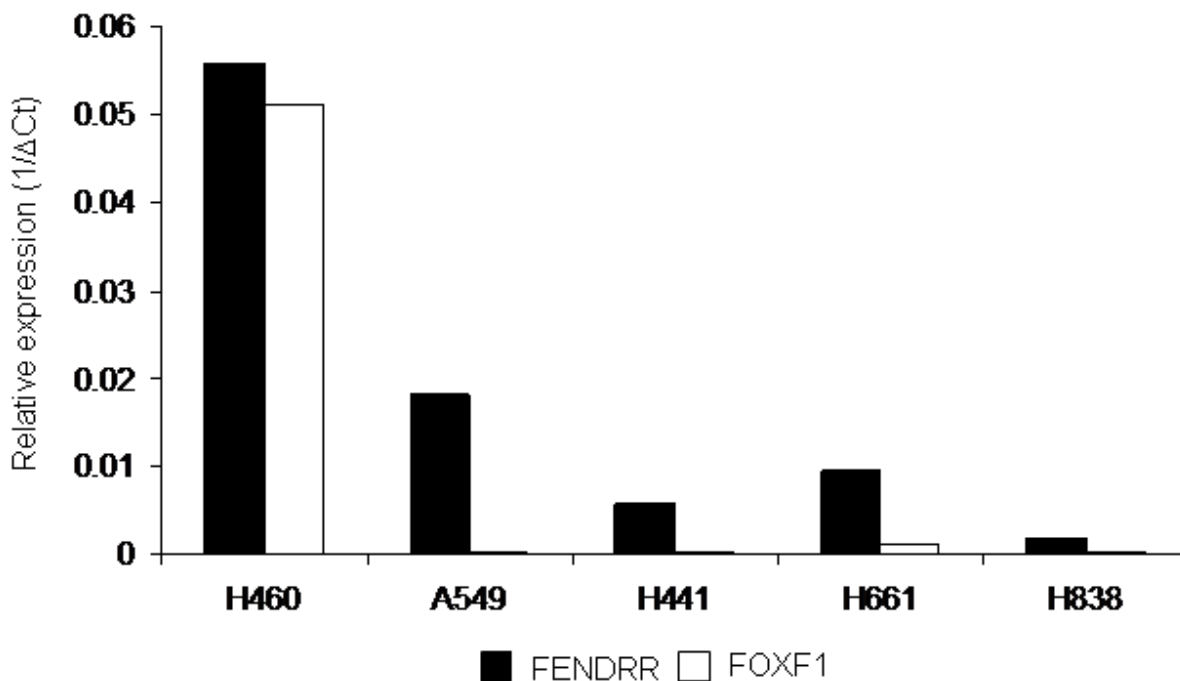

**Supplementary Figure 1: *FENDRR* and *FOXF1* mRNA expression on lung cancer cell lines.** The mRNA expression levels of *Fendrr* and *Foxf1* was determined by qRT-PCR on 5 lung cancer cell lines (A549, H441, H661, H838 and H460) available in ours lab. The H460 cell line expressed *FENDRR* and *FOXF1*.

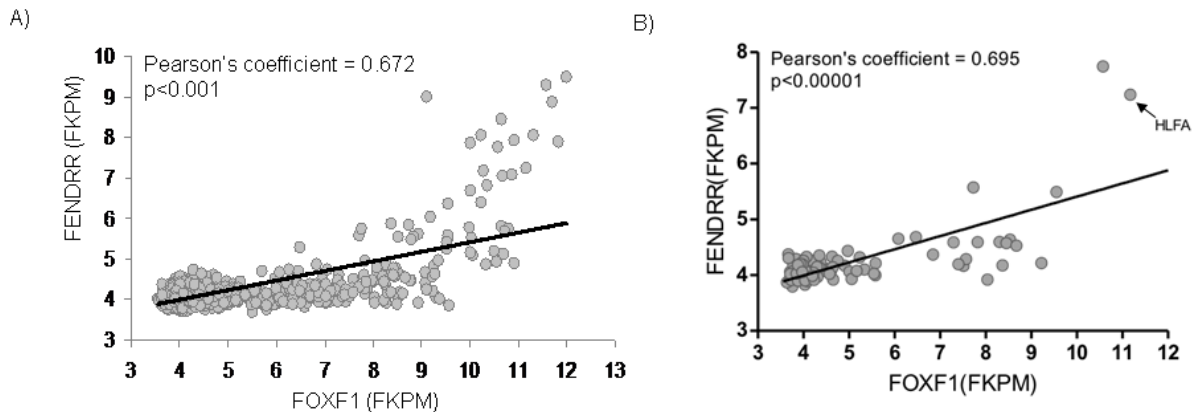

**Supplementary Figure 2: In silico analysis of *FENDRR* and *FOXF1* expression from Cancer Cell Line Encyclopedia (CCLE) database. (A)** Correlation of *FENDRR* and *FOXF1* expression levels in 1036 cancer cells lines. **(B)** Correlation of *FENDRR* and *FOXF1* expression levels in Non Small Lung Cancer cell lines (n=116). HLFA, a human cell line derived from normal embryonic lung tissue, showed the highest expression levels of *FENDRR* and *FOXF1*. *FPKM* (fragments per kilobase of transcript per million mapped reads).

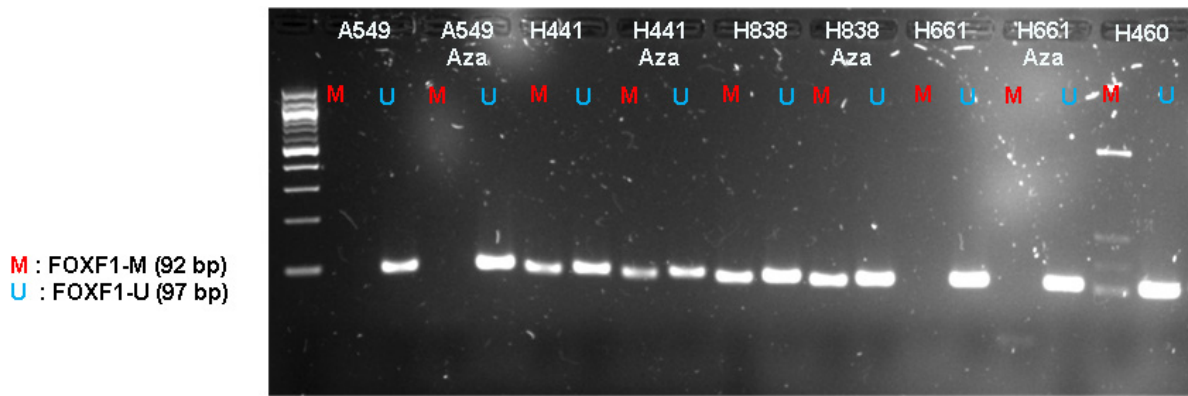

**Supplementary Figure 3: Methylation-specific PCR (MSP) assay for the detection of *FOXF1* promoter hypermethylation in 4 lung cancer cells lines treated with or without 5-aza-deoxycytidine (5-Aza). H460 cell line was used as control of *FENDRR* and *FOXF1* expression.**

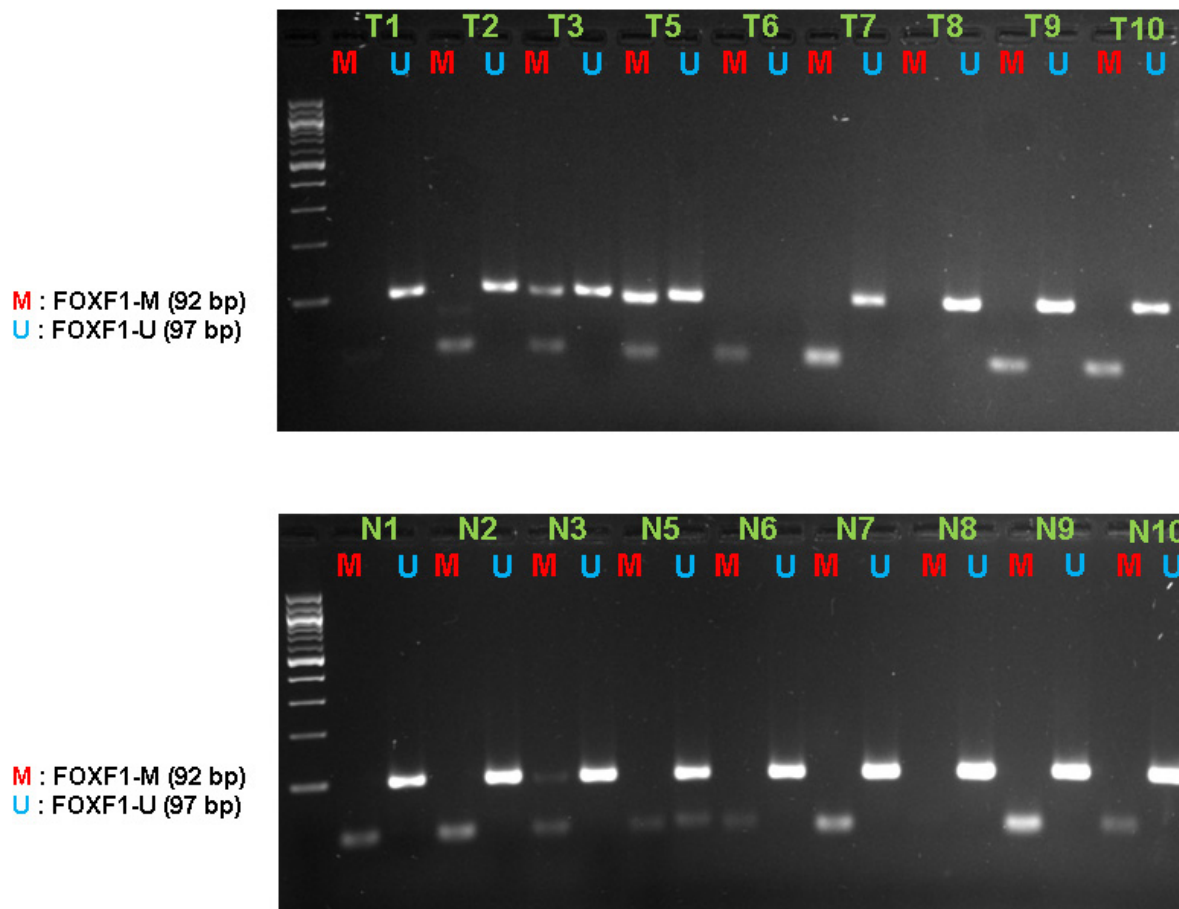

Supplementary Figure 4: Methylation-specific PCR (MSP) assay for the detection of *FOXF1* promoter hypermethylation in 10 lung adenocarcinoma samples (T) and their adjacent matched normal tissue (N).

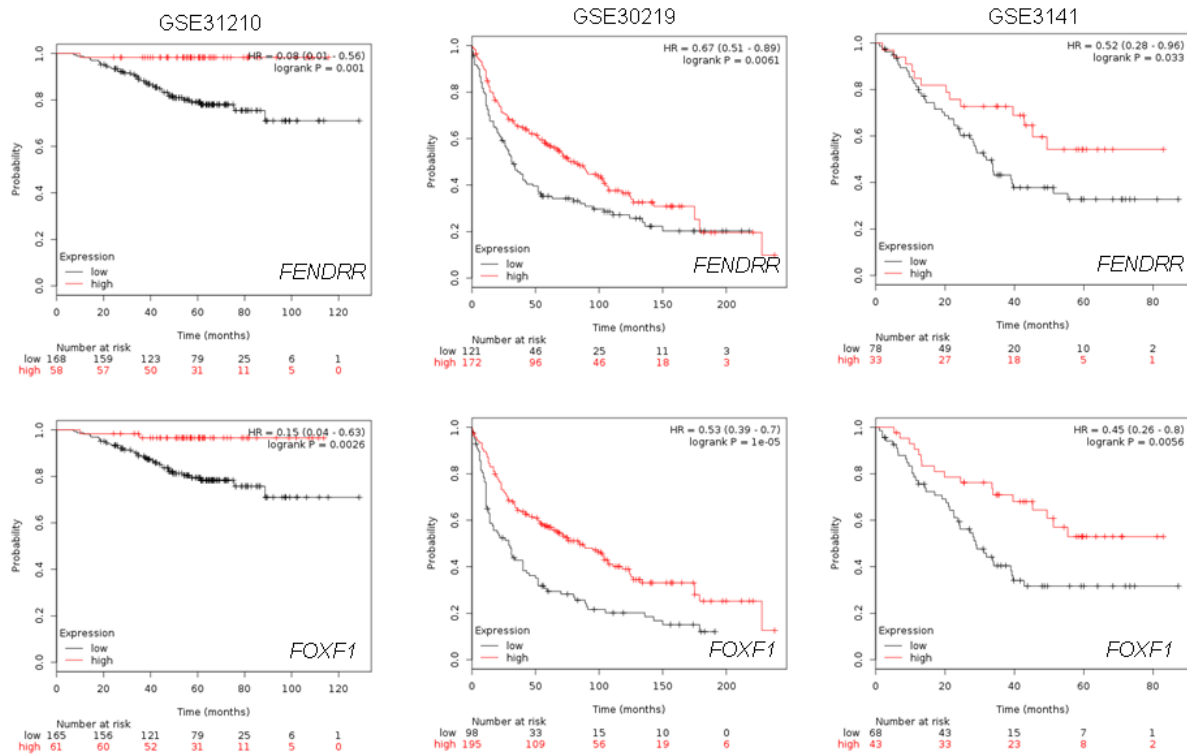

**Supplementary Figure 5: Kaplan-Meier survival plots based on three different GSE arrays (GSE31210, GSE30219 and GSE3141) from lung cancer patients.** Data were analyzed with the KM-plotter (<http://kmplot.com/analysis/>). Red and black lines indicate patients with high and low *FENRR* and *FOXF1* expression respectively. The total number of patients in the two categories are shown at the bottom of the panel. Hazard ratios (HR) and p values (log rank p) are shown at the top of the panel.

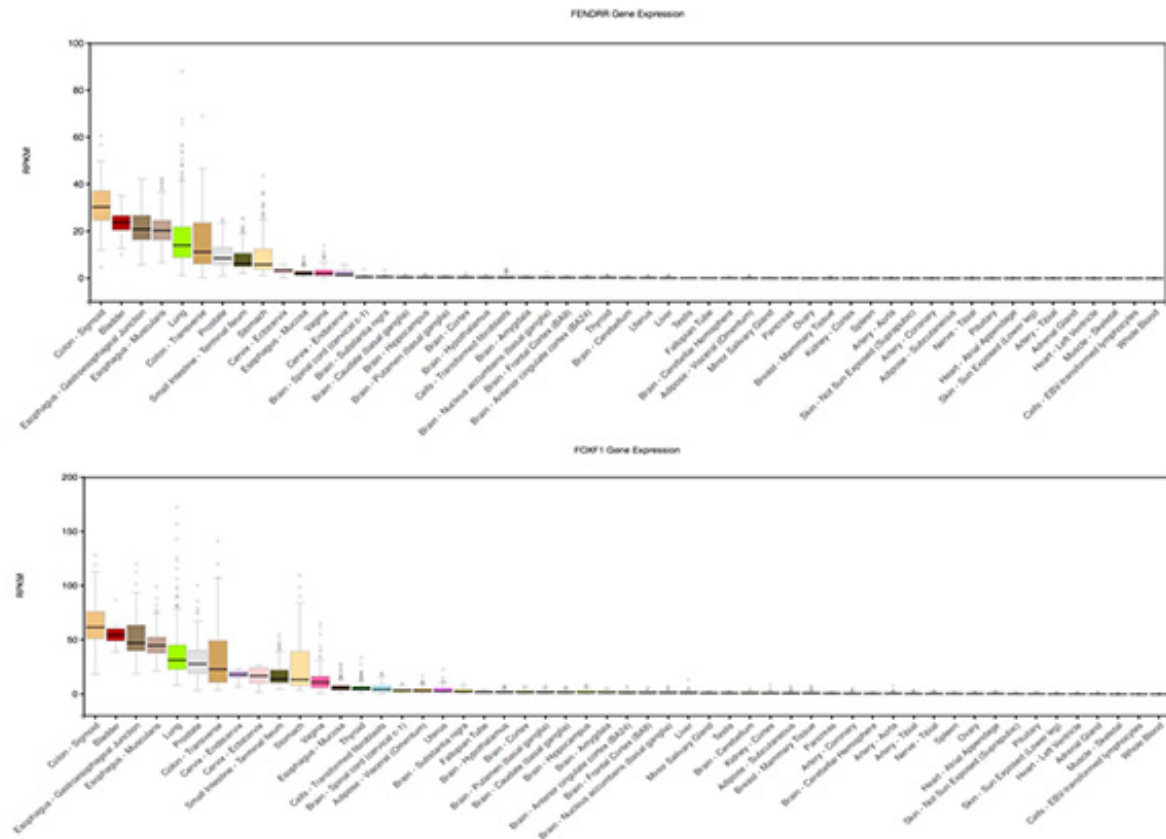

Supplementary Figure 6: *FENDRR* and *FOXF1* expression levels are relatively high in healthy lung tissue, with a median of 14 and 31 RPKM (Reads per kilo base per million of mapped reads) (n=320) respectively. Source: GTEx database.

Supplementary Table 1: Primers sequences using for qRT-PCR, pyrosequencing and MSP analysis

| <b>Primer qRT-PCR</b>     |                            |             |                                                                     |
|---------------------------|----------------------------|-------------|---------------------------------------------------------------------|
| F-FOXF1                   | GATGTCTTCGGCGCCCGAGA       |             |                                                                     |
| R-FOXF1                   | GGTAGGTGACCTGCTGGTGG       |             |                                                                     |
| F-FENDRR                  | AGATCCTCCCGTGGAAGCC        |             |                                                                     |
| R-FENDRR                  | CCTCAGAAATACACACCGGGG      |             |                                                                     |
| <b>Methylation assays</b> |                            |             |                                                                     |
| <b>Pyrosequencing</b>     |                            |             |                                                                     |
| <b>Oligo Name</b>         | <b>Oligo Sequence</b>      | <b>Size</b> | <b>Sequence to analyze</b>                                          |
| FOXF1/F1                  | GGGTTGGTTGTATTTTT          | 208bp       | TYGTTATYGG YGGTATTTT TTT                                            |
| FOXF1/R1Bio               | [Btm]AACTCCACTCCTTTCCTTATA |             |                                                                     |
| FOXF1/S1                  | GGGTTGGTTGTATTTTTG         |             |                                                                     |
| FOXF1/F2Bio               | [Btm]GGGTTGGTTGTATTTTTGT   | 209bp       | RAAAAAAACR AACRAAAACR<br>CRAAAACRAA CRCRCCRCRA<br>CTCRCTCRAA AAAAAT |
| FOXF1/R2                  | CAACTCCACTCCTTTCCTTATAAAA  |             |                                                                     |
| FOXF1/S2                  | ATCCAACAACCTCCTC           |             |                                                                     |
| <b>MSP</b>                |                            |             |                                                                     |
| <b>Oligon Name</b>        | <b>Oligo Sequence</b>      | <b>Size</b> |                                                                     |
| FOXF1/M/F                 | GGTTTTGAGTTAATCGTCGGC      | 92bp        |                                                                     |
| FOXF1/M/R                 | TTCTCCCGAACGAACCGC         |             |                                                                     |
| FOXF1/U/F                 | GGGGTTTTGAGTTAATGTGGT      | 97bp        |                                                                     |
| FOXF1/U/R                 | ACTTCTCCCAAACAAACCAC       |             |                                                                     |
